# Supplementary material for: Effects of porcine-derived collagen hydrolysates on 24 h blood pressure profiles, markers for endothelial dysfunction and low-grade inflammation and the retinal vasculature in adults with overweight/obesity: a randomized, controlled trial
Source: Royal Society of Chemistry journal article supplement (doi:10.1039/d5fo01261a), 2025-01-01
Supplement: d5fo01261a1.pdf [file d5fo01261a1.pdf]

## Supplementary material

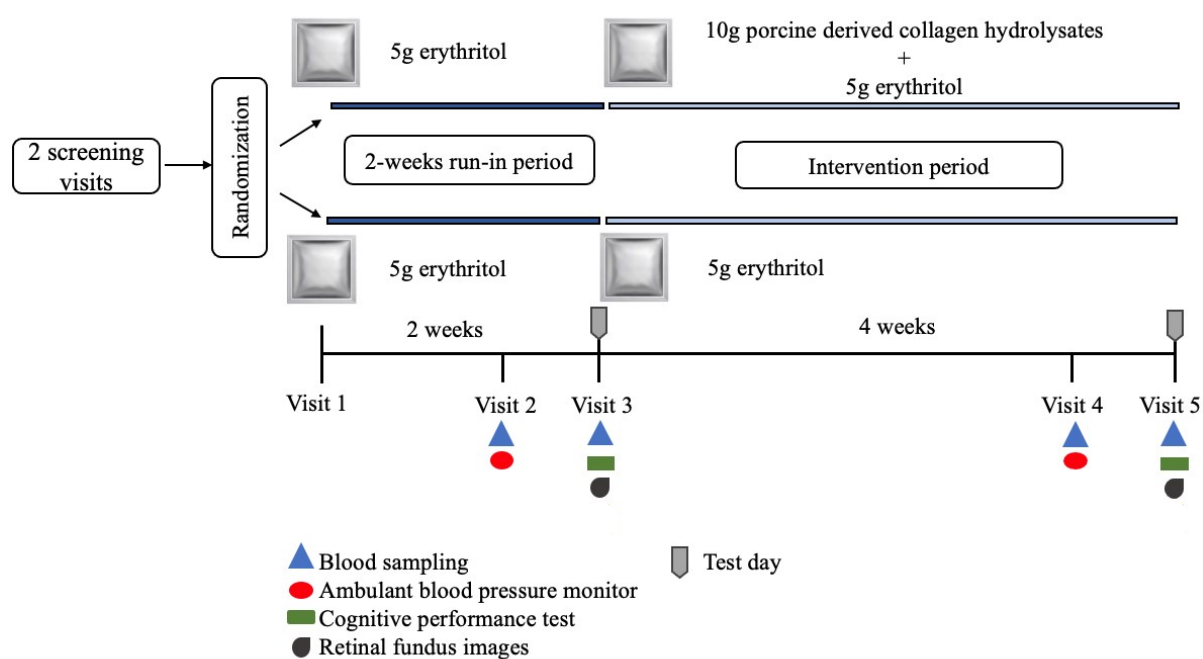

Supplementary Figure 1. Study design.

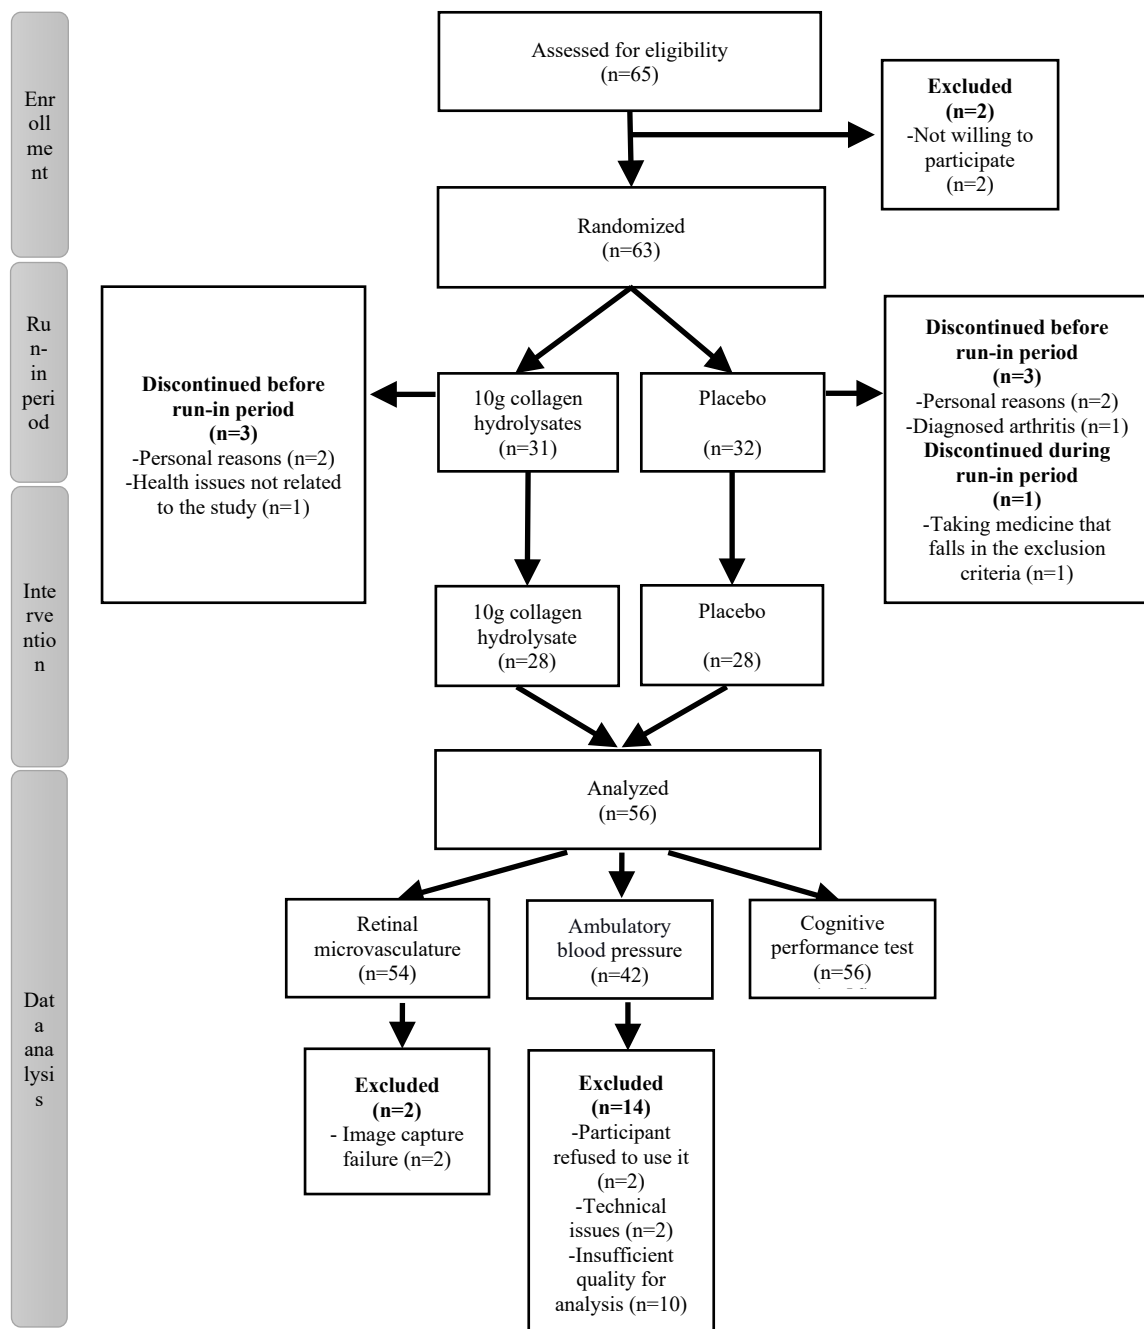

Supplementary Figure 2. Flow chart of the collagen hydrolysates study.

Supplementary Table 1. Baseline characteristics at screening of the total study population and per group

|                                       | Total<br>group      | Collagen-hydrolysates<br>group | Placebo<br>group    | Between group<br>p-value |
|---------------------------------------|---------------------|--------------------------------|---------------------|--------------------------|
| Age (years)                           | 61 ± 10             | 62 ± 11                        | 60 ± 9              | 0.400                    |
| Females N (%) <sup>a</sup>            | 30 (54)             | 16 (57)                        | 15 (54)             | 0.788                    |
| Body weight (kg)                      | 84.5 ± 10.9         | 84.4 ± 11.4                    | 84.6 ± 10.5         | 0.937                    |
| Height (cm)                           | 171.1 ± 8.6         | 169.7 ± 7.7                    | 172.5 ± 9.3         | 0.596                    |
| BMI (kg/m <sup>2</sup> ) <sup>b</sup> | 28.2 (27.0-30.4)    | 28.3 (27.2-31.7)               | 28.1 (26.4-29.1)    | 0.268                    |
| Office SBP (mmHg)                     | 130 ± 15            | 131 ± 15                       | 129 ± 16            | 0.341                    |
| Office DBP (mmHg)                     | 82 ± 8              | 81 ± 7                         | 84 ± 9              | 0.244                    |
| Waist Circumference (cm)              | 98.4 ± 9.5          | 99.0 ± 9.9                     | 97.7 ± 9.2          | 0.604                    |
| Hip Circumference (cm) <sup>b</sup>   | 105.7 (103.7-112.1) | 107.8 (104.3-113.8)            | 105.2 (103.7-111.2) | 0.431                    |
| TAG (mmol/L) <sup>b</sup>             | 1.21 (0.92-1.72)    | 1.39 (1.03-1.96)               | 1.00 (0.85-1.47)    | <b>0.049</b>             |
| Total Cholesterol (mmol/L)            | 5.68 ± 0.81         | 5.74 ± 0.52                    | 5.62 ± 1.02         | 0.306                    |

Abbreviations: BMI, body mass index; SBP, systolic blood pressure; DBP, diastolic blood pressure; TAG, triacylglycerol. Values are mean ± SD or median with ranges (25-75th percentiles)

Independent sample t-test; <sup>a</sup> Chi-square; <sup>b</sup> Mann-Whitney U test; In bold p-value < 0.05.

Collagen hydrolysate group n=28, placebo group n=28.

Supplementary Table 2. Effects of 10-gram collagen protein hydrolysates on daytime nighttime blood pressure profiles at the end of the run-in period and at the end of the intervention period per group

|                                                                    | Collagen-<br>hydrolysates group<br>Run-in period | Collagen-<br>hydrolysates group<br>End of study | Placebo group<br>Run-in period | Placebo group<br>End of study | Treatment effect<br>(95% CI) | p-<br>value |
|--------------------------------------------------------------------|--------------------------------------------------|-------------------------------------------------|--------------------------------|-------------------------------|------------------------------|-------------|
| <b>Daytime blood pressure</b>                                      |                                                  |                                                 |                                |                               |                              |             |
| SBP (mmHg)                                                         | 132 ± 12                                         | 128 ± 11                                        | 129 ± 11                       | 126 ± 8                       | 1 (-3, 5)                    | 0.731       |
| DBP (mmHg)                                                         | 81 ± 9                                           | 78 ± 9                                          | 81 ± 7                         | 80 ± 6                        | -2 (-6, 1)                   | 0.146       |
| MAP (mmHg)                                                         | 105 ± 10                                         | 101 ± 9                                         | 103 ± 9                        | 101 ± 6                       | -1 (-5, 2)                   | 0.441       |
| HR (beats/min)                                                     | 68 ± 9                                           | 68 ± 7                                          | 71 ± 9                         | 71 ± 10                       | 0 (-3, 3)                    | 0.816       |
| PP (mmHg)                                                          | 50 ± 9                                           | 51 ± 7                                          | 47 ± 8                         | 45 ± 7                        | 3 (0, 7)                     | 0.050       |
| <b>Nighttime blood pressure</b>                                    |                                                  |                                                 |                                |                               |                              |             |
| SBP (mmHg)                                                         | 120 ± 11                                         | 117 ± 9                                         | 114 ± 10                       | 118 ± 13                      | -2 (-9, 4)                   | 0.453       |
| DBP (mmHg)                                                         | 70 ± 9                                           | 69 ± 7                                          | 70 ± 6                         | 69 ± 9                        | -1 (-5, 4)                   | 0.735       |
| MAP (mmHg)                                                         | 93 ± 9                                           | 91 ± 7                                          | 90 ± 7                         | 91 ± 10                       | -2 (-7, 3)                   | 0.506       |
| HR (beats/min)                                                     | 59 ± 8                                           | 59 ± 9                                          | 60 ± 8                         | 61 ± 9                        | -1 (-4, 2)                   | 0.529       |
| PP (mmHg) <sup>a</sup>                                             | 50 ± 8                                           | 48 ± 6                                          | 45 ± 7                         | 47 ± 7                        |                              | 0.336       |
| <b>SD of individual</b>                                            |                                                  |                                                 |                                |                               |                              |             |
| SD 24-hour SBP (mmHg)                                              | 13 ± 3                                           | 13 ± 4                                          | 13 ± 4                         | 13 ± 4                        | 0 (-2, 2)                    | 0.952       |
| SD 24-hour DBP (mmHg) <sup>a</sup>                                 | 10 ± 2                                           | 10 ± 4                                          | 9 ± 3                          | 10 ± 4                        |                              | 0.457       |
| SD 24-hour HR (beats/min)                                          | 8 ± 3                                            | 11 ± 3                                          | 10 ± 4                         | 11 ± 4                        | 1 (-2, 3)                    | 0.493       |
| SD daytime SBP (mmHg)                                              | 8 ± 2                                            | 12 ± 5                                          | 7 ± 3                          | 11 ± 5                        | 0 (-2, 3)                    | 0.766       |
| SD daytime DBP (mmHg) <sup>a</sup>                                 | 8 ± 3                                            | 9 ± 4                                           | 7 ± 2                          | 8 ± 5                         |                              | 0.085       |
| SD daytime HR (beats/min)                                          | 7 ± 4                                            | 8 ± 4                                           | 9 ± 4                          | 9 ± 7                         |                              |             |
| SD daytime HR (beats/min) <i>log<sub>10</sub> back transformed</i> | 7 ± 2                                            | 8 ± 2                                           | 8 ± 2                          | 8 ± 2                         |                              | 0.411       |
| SD nighttime SBP (mmHg)                                            | 7 ± 5                                            | 8 ± 4                                           | 9 ± 3                          | 9 ± 4                         |                              |             |
| SD nighttime SBP (mmHg) <i>log<sub>10</sub> back transformed</i>   | 8 ± 2                                            | 7 ± 2                                           | 8 ± 1                          | 9 ± 2                         |                              | 0.277       |
| SD nighttime DBP (mmHg)                                            | 8 ± 3                                            | 7 ± 3                                           | 7 ± 2                          | 8 ± 3                         | -1 (-3, 2)                   | 0.554       |
| SD nighttime HR (beats/min)                                        | 4 ± 2                                            | 5 ± 2                                           | 5 ± 2                          | 4 ± 3                         | -1 (-4, 2)                   | 0.596       |

Abbreviations: SBP systolic blood pressure; DBP, diastolic blood pressure; MAP, mean arterial pressure; PP, pulse pressure; HR, heart rate. Values are mean  $\pm$  SD. Treatment effect changes were evaluated with 1-factor ANCOVA with baseline value as a covariate. <sup>a</sup> When residuals were not normally distributed, treatment effect changes were evaluated with Quade's ANCOVA with baseline value as a covariate. In bold p-value < 0.05.

The treatment effect was estimated as the difference in changes (End of study - Run-in) between the collagen hydrolysates group and the placebo group, adjusted for run-in values. Collagen hydrolysates group n=19, placebo group n=23.
